# Supplementary material for: On the Kinematics of the Forward-Facing Venetian-Style Rowing Technique
Source: MDPI journal article supplement (doi:10.3390/bioengineering10030310), 2023-02-28

# On the Kinematics of the Forward-Facing Venetian-style Rowing Technique

by Joseph N. Grima *et al.*

Email: [joseph.grima@um.edu.mt](mailto:joseph.grima@um.edu.mt); [tonio.p.agius@um.edu.mt](mailto:tonio.p.agius@um.edu.mt)

**Table S1:** Detailed statistical information related to angular measurements (in degrees)

**Figure S1:** Angle-Angle graphs, plotted against Thorax1: (a) Pelvis1 & Hip1 vs. Thorax1; (b) L/RHip1, L/RKnee1 & L/RAnkle1 vs. Thorax1; (c) L/RShoulder1 & L/RElbow1 vs. Thorax1.

**Figure S2:** Angle-Angle graphs, plotted against LKnee1 : (a) Thorax1, Pelvis1 & Hip1 vs. LKnee1; (b) L/RHip1, RKnee1 & L/RAnkle1 vs. LKnee1; (c) L/RShoulder1 & L/RElbow1 vs. LKnee1.

**Figure S3:** Angle-Angle graphs, plotted against LElbow1: (a) Thorax1, Pelvis1 & Hip1 vs. LElbow1; (b) L/RHip1, L/RKnee1 & L/RAnkle1 vs. LElbow1; (c) L/RShoulder1 & RElbow1 vs. LElbow1.

**Table S1 (Part 1)**

| Angle*:                                                   | Thorax1 | Thorax2 | Thorax3 | Pelvis1 | Pelvis2 | Pelvis3 | Spine1 | Spine2 | Spine3 |
|-----------------------------------------------------------|---------|---------|---------|---------|---------|---------|--------|--------|--------|
| <b>Range of motion, <math>\theta_{\text{ROM}}</math></b>  |         |         |         |         |         |         |        |        |        |
| Mean                                                      | 32.3    | 14.9    | 14.5    | 30.4    | 13.3    | 14.8    | 7.0    | 6.1    | 5.5    |
| 95% CI for Mean (lower)                                   | 24.4    | 11.7    | 11.6    | 24.0    | 9.9     | 11.8    | 5.5    | 5.3    | 4.5    |
| 95% CI for Mean (upper)                                   | 40.3    | 18.2    | 17.4    | 36.8    | 16.7    | 17.7    | 8.5    | 6.9    | 6.5    |
| Median                                                    | 31.0    | 14.5    | 12.0    | 30.5    | 11.5    | 13.5    | 7.5    | 6.0    | 5.5    |
| St. Dev.                                                  | 12.5    | 5.1     | 4.6     | 10.0    | 5.3     | 4.7     | 2.4    | 1.3    | 1.6    |
| Minimum                                                   | 15.0    | 6.0     | 9.0     | 12.0    | 8.0     | 8.0     | 3.0    | 4.0    | 4.0    |
| Maximum                                                   | 49.0    | 24.0    | 25.0    | 46.0    | 23.0    | 25.0    | 11.0   | 8.0    | 9.0    |
| IQR                                                       | 24.5    | 7.8     | 5.8     | 15.8    | 9.3     | 6.8     | 4.0    | 1.8    | 2.8    |
|                                                           |         |         |         |         |         |         |        |        |        |
| <b>Minimum measured, <math>\theta_{\text{min}}</math></b> |         |         |         |         |         |         |        |        |        |
| Mean                                                      | 39.5    | -2.8    | -13.4   | 19.4    | -1.0    | -10.4   | 17.6   | -2.9   | -2.4   |
| 95% CI for Mean (lower)                                   | 36.3    | -6.1    | -15.2   | 15.1    | -4.3    | -13.4   | 13.8   | -6.4   | -5.1   |
| 95% CI for Mean (upper)                                   | 42.7    | 0.4     | -11.7   | 23.8    | 2.3     | -7.4    | 21.3   | 0.6    | 0.3    |
| Median                                                    | 38.5    | -3.0    | -13.0   | 20.0    | -3.0    | -9.0    | 16.5   | -1.5   | -3.5   |
| St. Dev.                                                  | 5.1     | 5.1     | 2.7     | 6.9     | 5.2     | 4.7     | 5.9    | 5.5    | 4.3    |
| Minimum                                                   | 34.0    | -10.0   | -20.0   | 8.0     | -6.0    | -21.0   | 9.0    | -13.0  | -9.0   |
| Maximum                                                   | 49.0    | 5.0     | -10.0   | 32.0    | 8.0     | -6.0    | 25.0   | 3.0    | 5.0    |
| IQR                                                       | 7.3     | 8.8     | 4.0     | 10.8    | 9.0     | 5.5     | 11.3   | 7.5    | 6.8    |
|                                                           |         |         |         |         |         |         |        |        |        |
| <b>Maximum measured, <math>\theta_{\text{max}}</math></b> |         |         |         |         |         |         |        |        |        |
| Mean                                                      | 71.7    | 12.1    | 1.3     | 49.8    | 12.4    | 4.4     | 24.5   | 2.9    | 3.0    |
| 95% CI for Mean (lower)                                   | 65.3    | 8.1     | -0.2    | 45.9    | 8.0     | 2.2     | 19.4   | -0.7   | 0.5    |
| 95% CI for Mean (upper)                                   | 78.0    | 16.1    | 2.7     | 53.6    | 16.8    | 6.6     | 29.6   | 6.6    | 5.5    |
| Median                                                    | 73.0    | 14.5    | 0.5     | 48.5    | 11.5    | 4.0     | 25.0   | 5.0    | 1.0    |
| St. Dev.                                                  | 10.0    | 6.3     | 2.3     | 6.1     | 6.9     | 3.4     | 8.0    | 5.8    | 3.9    |
| Minimum                                                   | 55.0    | 0.0     | -1.0    | 43.0    | 3.0     | -1.0    | 12.0   | -7.0   | -1.0   |
| Maximum                                                   | 84.0    | 18.0    | 5.0     | 59.0    | 22.0    | 12.0    | 36.0   | 8.0    | 10.0   |
| IQR                                                       | 17.0    | 10.5    | 4.8     | 11.8    | 12.5    | 3.5     | 13.8   | 10.3   | 6.8    |

Note: \*All angles reported in degrees.

Table S1 (Part 2)

| Angle*:                                 | Hip1 (L) | Hip2 (L) | Hip3 (L) | Hip1 (R) | Hip2 (R) | Hip3 (R) | Knee1 (L) | Knee1 (R) | Ankle1 (L) | Ankle1 (R) |
|-----------------------------------------|----------|----------|----------|----------|----------|----------|-----------|-----------|------------|------------|
| Range of motion, $\theta_{\text{ROM}}$  |          |          |          |          |          |          |           |           |            |            |
| Mean                                    | 41.0     | 6.1      | 7.6      | 13.7     | 15.4     | 11.8     | 52.4      | 22.5      | 34.3       | 22.9       |
| 95% CI for Mean (lower)                 | 33.7     | 4.6      | 5.9      | 9.2      | 11.1     | 5.6      | 43.9      | 14.6      | 29.0       | 17.2       |
| 95% CI for Mean (upper)                 | 48.3     | 7.6      | 9.3      | 18.1     | 19.7     | 17.9     | 60.9      | 30.4      | 39.5       | 28.6       |
| Median                                  | 45.0     | 5.5      | 8.0      | 12.5     | 13.5     | 8.5      | 54.0      | 22.0      | 34.0       | 20.5       |
| St. Dev.                                | 11.4     | 2.4      | 2.7      | 7.0      | 6.8      | 9.7      | 13.4      | 12.4      | 8.2        | 9.0        |
| Minimum                                 | 19.0     | 3.0      | 3.0      | 4.0      | 7.0      | 4.0      | 34.0      | 7.0       | 23.0       | 11.0       |
| Maximum                                 | 53.0     | 9.0      | 11.0     | 25.0     | 28.0     | 35.0     | 67.0      | 41.0      | 46.0       | 38.0       |
| IQR                                     | 19.0     | 4.8      | 3.8      | 11.5     | 12.3     | 10.8     | 25.8      | 21.0      | 16.0       | 14.0       |
|                                         |          |          |          |          |          |          |           |           |            |            |
| Minimum measured, $\theta_{\text{min}}$ |          |          |          |          |          |          |           |           |            |            |
| Mean                                    | 53.7     | -0.3     | -6.3     | -2.3     | -15.3    | 4.4      | 6.4       | 6.7       | -38.3      | -4.8       |
| 95% CI for Mean (lower)                 | 48.8     | -3.4     | -12.2    | -6.0     | -21.2    | -3.0     | -0.3      | 1.3       | -42.6      | -13.4      |
| 95% CI for Mean (upper)                 | 58.6     | 2.9      | -0.5     | 1.5      | -9.3     | 11.9     | 13.1      | 12.0      | -33.9      | 3.7        |
| Median                                  | 56.5     | -1.5     | -5.5     | 0.0      | -16.5    | 8.0      | 3.5       | 8.0       | -41.0      | -4.5       |
| St. Dev.                                | 7.7      | 5.0      | 9.2      | 5.9      | 9.3      | 11.7     | 10.5      | 8.4       | 6.8        | 13.5       |
| Minimum                                 | 40.0     | -6.0     | -20.0    | -13.0    | -26.0    | -15.0    | -5.0      | -13.0     | -45.0      | -24.0      |
| Maximum                                 | 64.0     | 9.0      | 5.0      | 3.0      | -3.0     | 17.0     | 25.0      | 15.0      | -26.0      | 10.0       |
| IQR                                     | 12.3     | 7.5      | 17.8     | 10.5     | 19.0     | 22.5     | 19.3      | 10.5      | 12.3       | 24.8       |
|                                         |          |          |          |          |          |          |           |           |            |            |
| Maximum measured, $\theta_{\text{max}}$ |          |          |          |          |          |          |           |           |            |            |
| Mean                                    | 94.7     | 5.8      | 1.1      | 11.4     | 0.3      | 16.2     | 58.8      | 28.9      | -3.9       | 18.4       |
| 95% CI for Mean (lower)                 | 86.4     | 1.5      | -5.7     | 5.9      | -4.2     | 4.5      | 45.3      | 18.4      | -11.2      | 12.9       |
| 95% CI for Mean (upper)                 | 103.0    | 10.0     | 7.9      | 16.9     | 4.8      | 27.8     | 72.2      | 39.4      | 3.4        | 24.0       |
| Median                                  | 100.5    | 3.5      | 4.0      | 7.5      | 1.5      | 17.0     | 54.5      | 29.5      | -4.0       | 20.5       |
| St. Dev.                                | 13.1     | 6.6      | 10.7     | 8.6      | 7.1      | 18.3     | 21.2      | 16.6      | 11.4       | 8.7        |
| Minimum                                 | 75.0     | -1.0     | -16.0    | 4.0      | -10.0    | -9.0     | 33.0      | 1.0       | -18.0      | 1.0        |
| Maximum                                 | 107.0    | 18.0     | 13.0     | 27.0     | 11.0     | 49.0     | 92.0      | 54.0      | 11.0       | 28.0       |
| IQR                                     | 27.0     | 11.0     | 20.8     | 14.8     | 12.0     | 32.5     | 41.3      | 24.5      | 21.8       | 16.5       |

Note: All angles reported in degrees.

Table S1 (Part 3)

| Angle*:                                 | Shoulder1 (L) | Shoulder2 (L) | Shoulder3 (L) | Shoulder1 (R) | Shoulder2 (R) | Shoulder3 (R) | Elbow1 (L) | Elbow1 (R) |
|-----------------------------------------|---------------|---------------|---------------|---------------|---------------|---------------|------------|------------|
| Range of motion, $\theta_{\text{ROM}}$  |               |               |               |               |               |               |            |            |
| Mean                                    | 77.0          | 145.0         | 125.6         | 49.4          | 72.3          | 93.5          | 71.6       | 45.9       |
| 95% CI for Mean (lower)                 | 71.5          | 130.4         | 117.1         | 33.5          | 60.5          | 78.3          | 67.2       | 39.1       |
| 95% CI for Mean (upper)                 | 82.5          | 159.6         | 134.0         | 65.3          | 84.0          | 108.7         | 75.9       | 52.7       |
| Median                                  | 79.5          | 154.5         | 122.5         | 47.5          | 75.0          | 86.0          | 69.0       | 48.5       |
| St. Dev.                                | 8.6           | 22.9          | 13.3          | 25.0          | 18.5          | 24.0          | 6.8        | 10.7       |
| Minimum                                 | 60.0          | 102.0         | 107.0         | 20.0          | 36.0          | 63.0          | 64.0       | 30.0       |
| Maximum                                 | 88.0          | 166.0         | 146.0         | 88.0          | 94.0          | 138.0         | 82.0       | 59.0       |
| IQR                                     | 10.0          | 38.5          | 24.3          | 48.8          | 32.3          | 42.0          | 14.3       | 21.3       |
|                                         |               |               |               |               |               |               |            |            |
| Minimum measured, $\theta_{\text{min}}$ |               |               |               |               |               |               |            |            |
| Mean                                    | -14.4         | 13.3          | -99.2         | -2.7          | 38.3          | -72.4         | 27.2       | 38.2       |
| 95% CI for Mean (lower)                 | -21.2         | 8.3           | -107.6        | -10.3         | 28.4          | -79.0         | 24.2       | 33.4       |
| 95% CI for Mean (upper)                 | -7.6          | 18.3          | -90.8         | 5.0           | 48.3          | -65.8         | 30.1       | 43.0       |
| Median                                  | -12.5         | 11.0          | -98.5         | -4.0          | 37.0          | -70.0         | 25.0       | 40.5       |
| St. Dev.                                | 10.7          | 7.9           | 13.2          | 12.0          | 15.6          | 10.4          | 4.6        | 7.6        |
| Minimum                                 | -29.0         | 4.0           | -122.0        | -18.0         | 19.0          | -90.0         | 23.0       | 26.0       |
| Maximum                                 | 1.0           | 29.0          | -79.0         | 19.0          | 64.0          | -57.0         | 36.0       | 48.0       |
| IQR                                     | 22.8          | 13.5          | 22.3          | 20.5          | 30.3          | 19.3          | 7.8        | 15.5       |
|                                         |               |               |               |               |               |               |            |            |
| Maximum measured, $\theta_{\text{max}}$ |               |               |               |               |               |               |            |            |
| Mean                                    | 62.8          | 158.3         | 26.5          | 46.8          | 110.3         | 21.2          | 98.8       | 83.9       |
| 95% CI for Mean (lower)                 | 54.2          | 148.3         | 20.7          | 35.7          | 105.0         | 10.4          | 94.9       | 74.1       |
| 95% CI for Mean (upper)                 | 71.3          | 168.2         | 32.3          | 58.0          | 115.6         | 32.0          | 102.6      | 93.7       |
| Median                                  | 64.0          | 164.0         | 25.0          | 47.0          | 111.0         | 19.0          | 100.0      | 90.5       |
| St. Dev.                                | 13.5          | 15.7          | 9.1           | 17.5          | 8.3           | 17.0          | 6.1        | 15.4       |
| Minimum                                 | 45.0          | 130.0         | 16.0          | 21.0          | 97.0          | -1.0          | 89.0       | 56.0       |
| Maximum                                 | 83.0          | 173.0         | 42.0          | 71.0          | 122.0         | 53.0          | 107.0      | 100.0      |
| IQR                                     | 24.3          | 27.3          | 17.5          | 34.8          | 15.0          | 29.5          | 12.0       | 29.5       |

Note: \*All angles reported in degrees.

Figure S1(a)

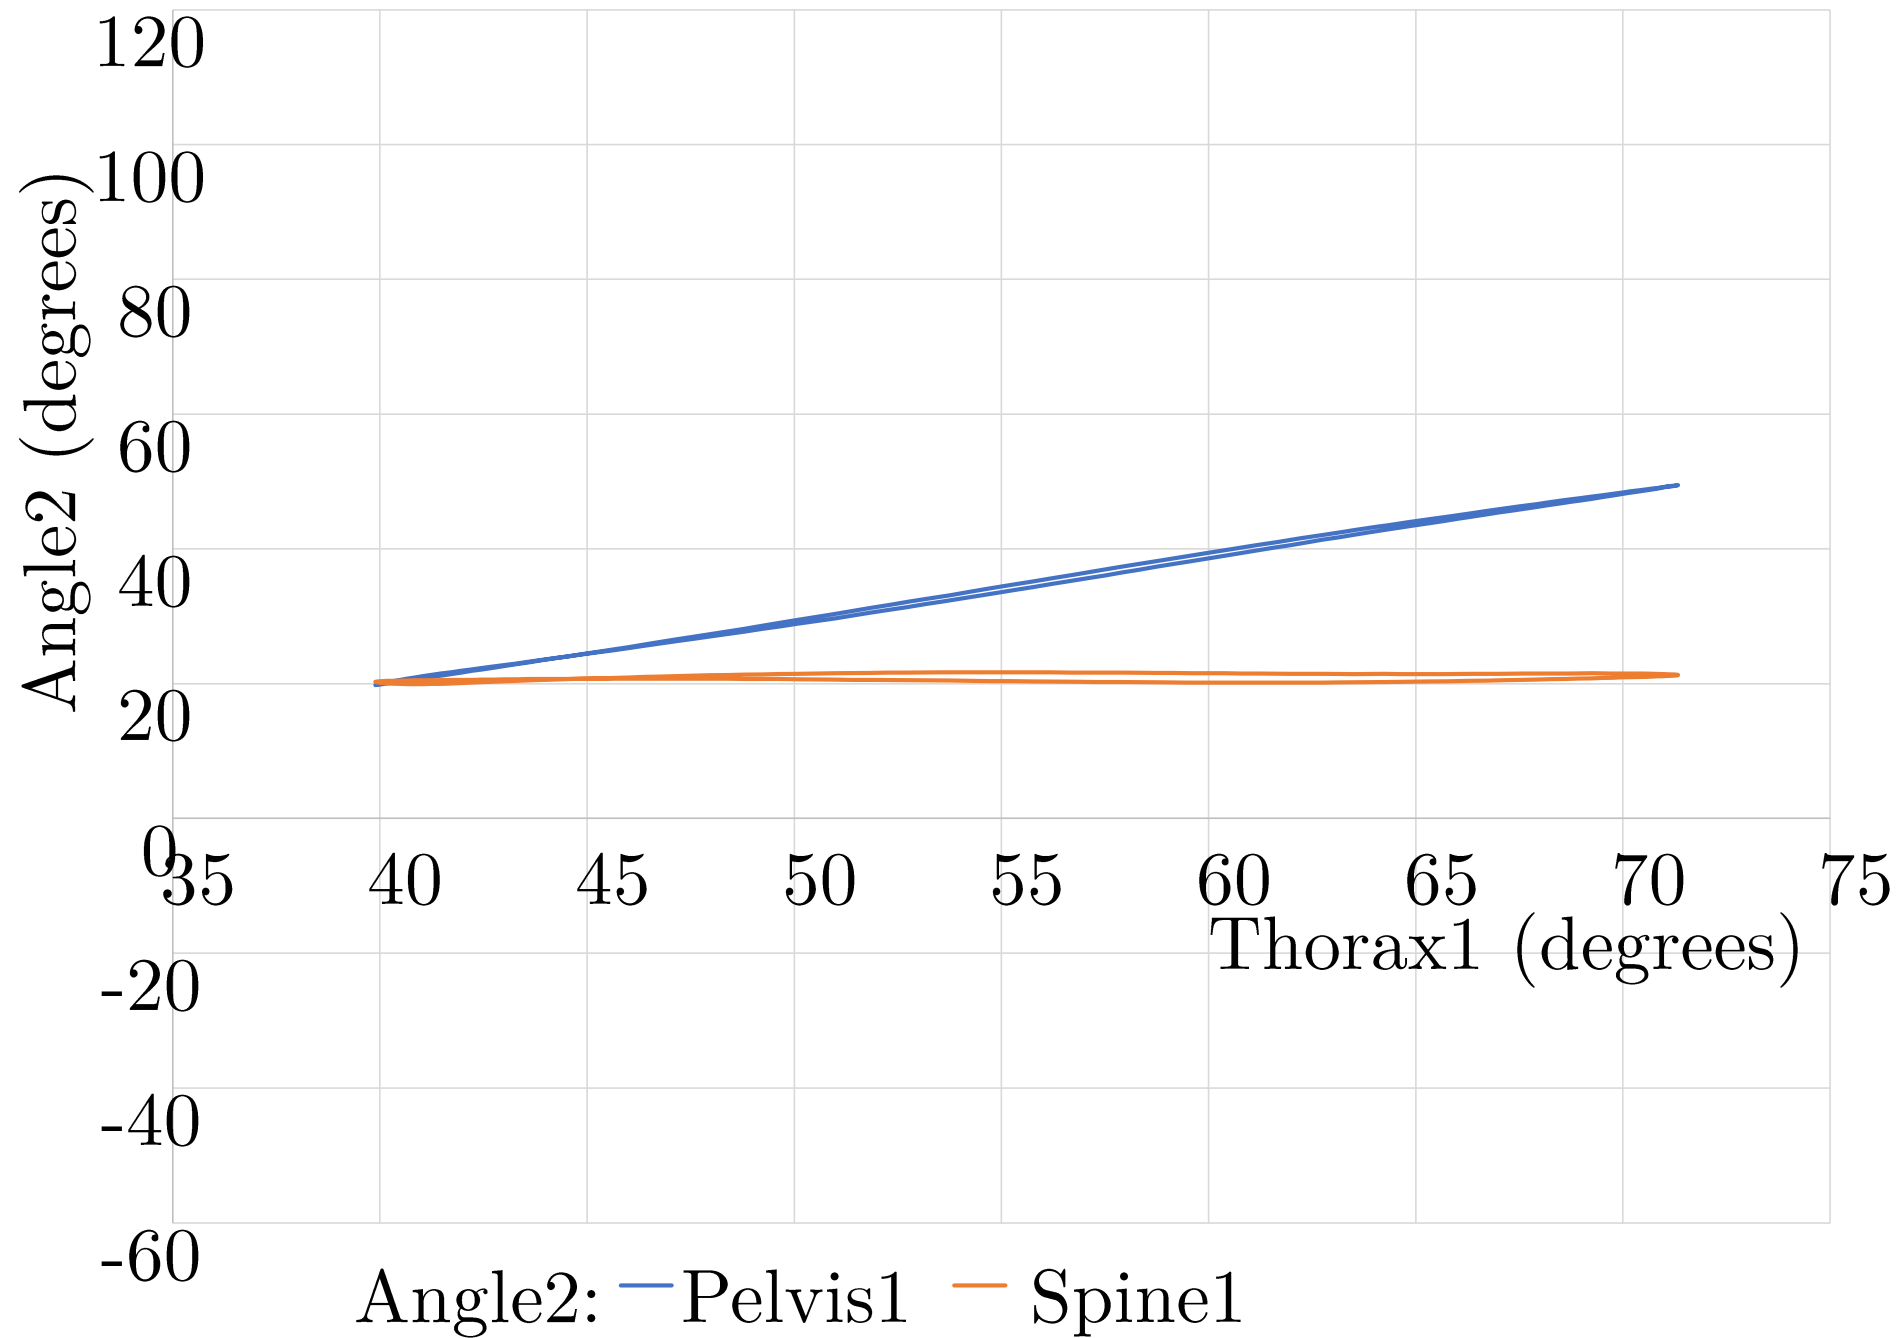

Figure S1(b)

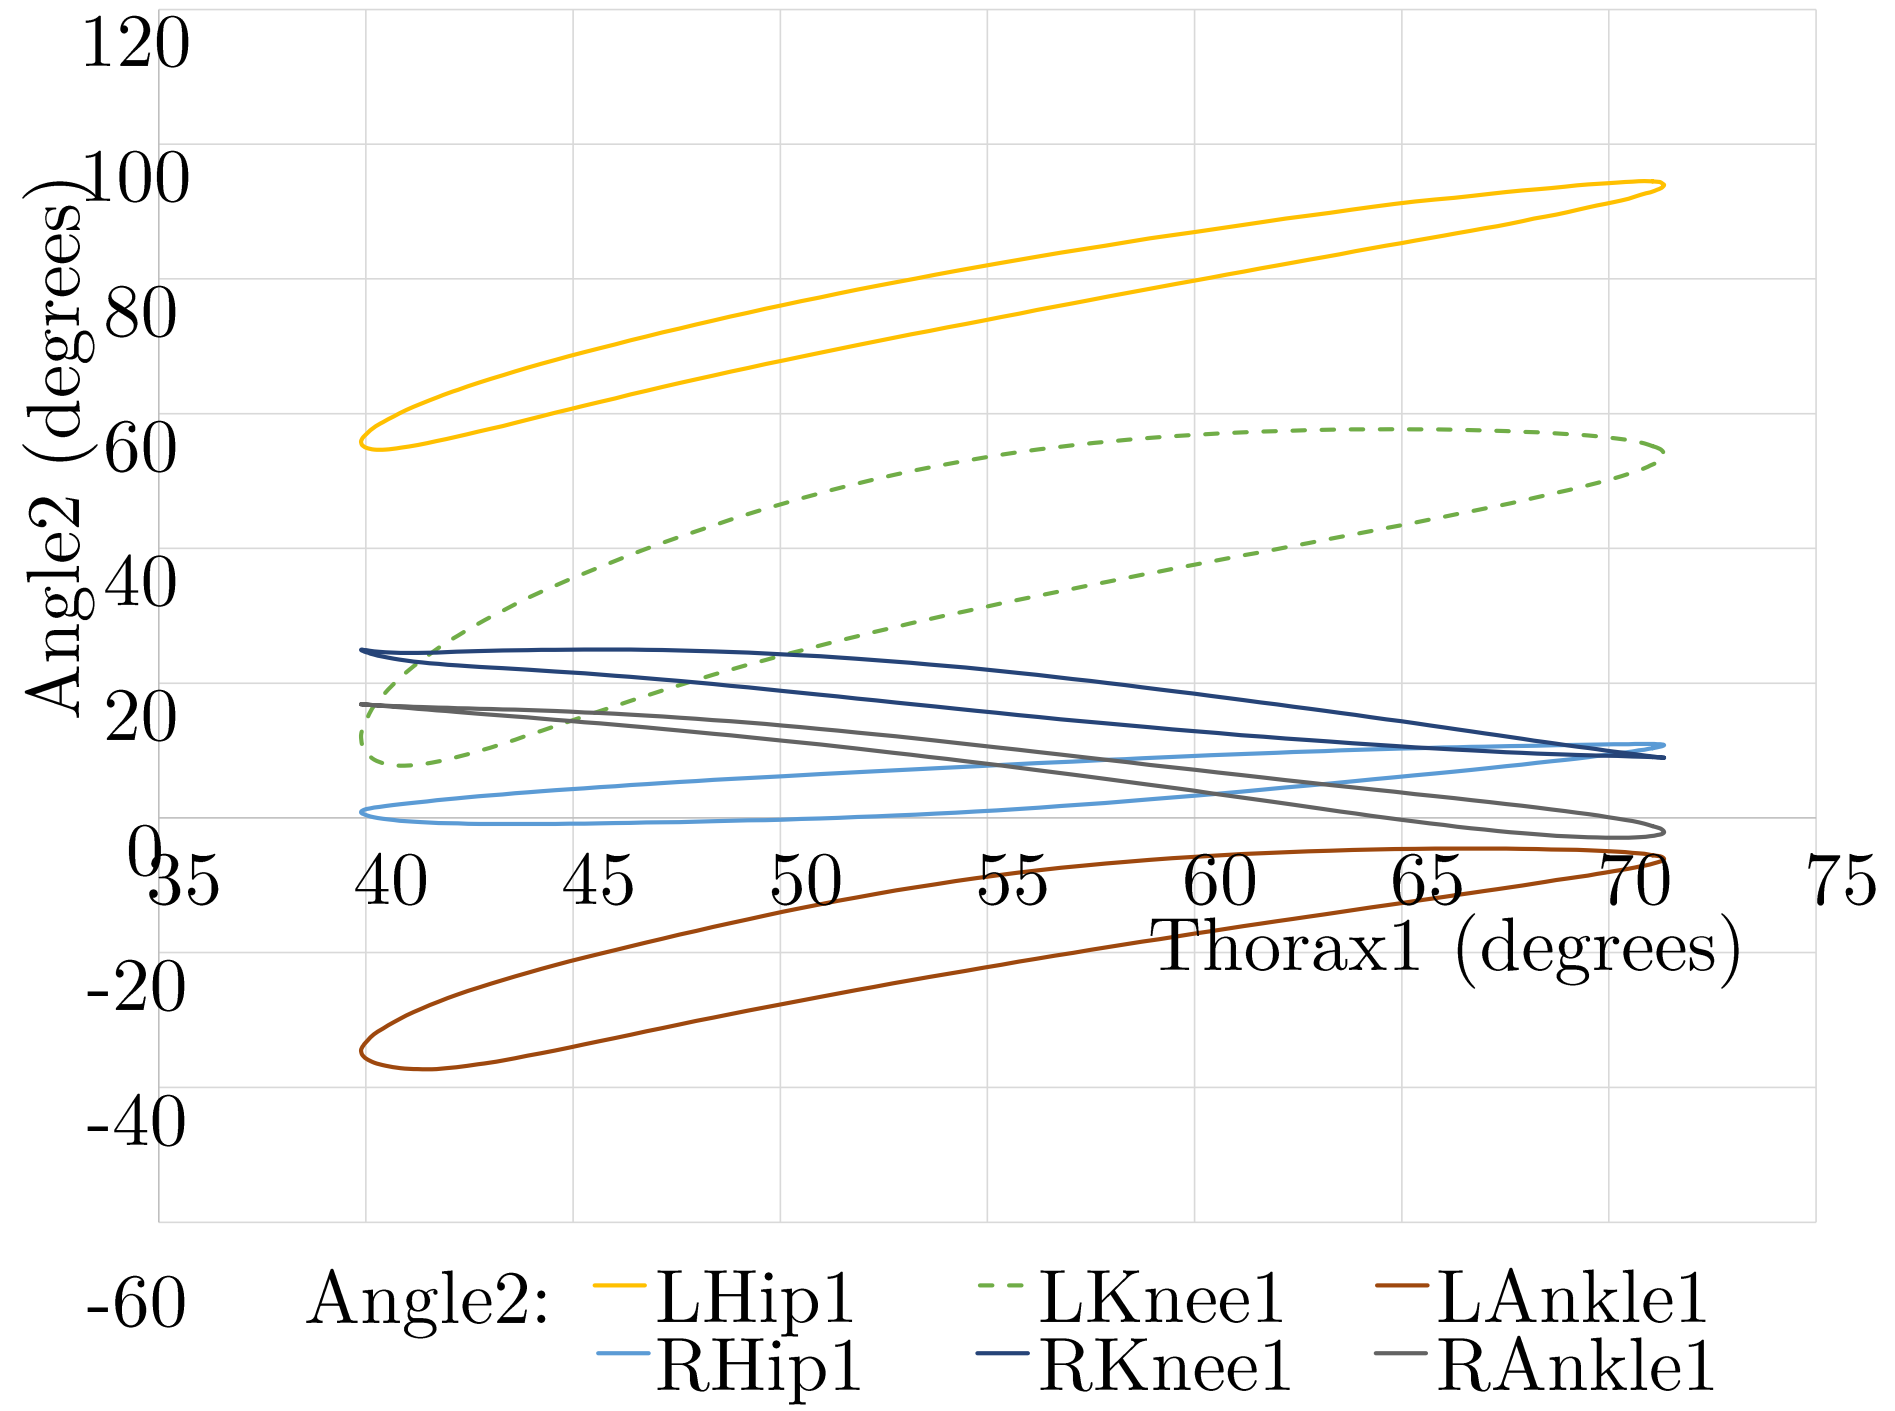

Figure S1(c)

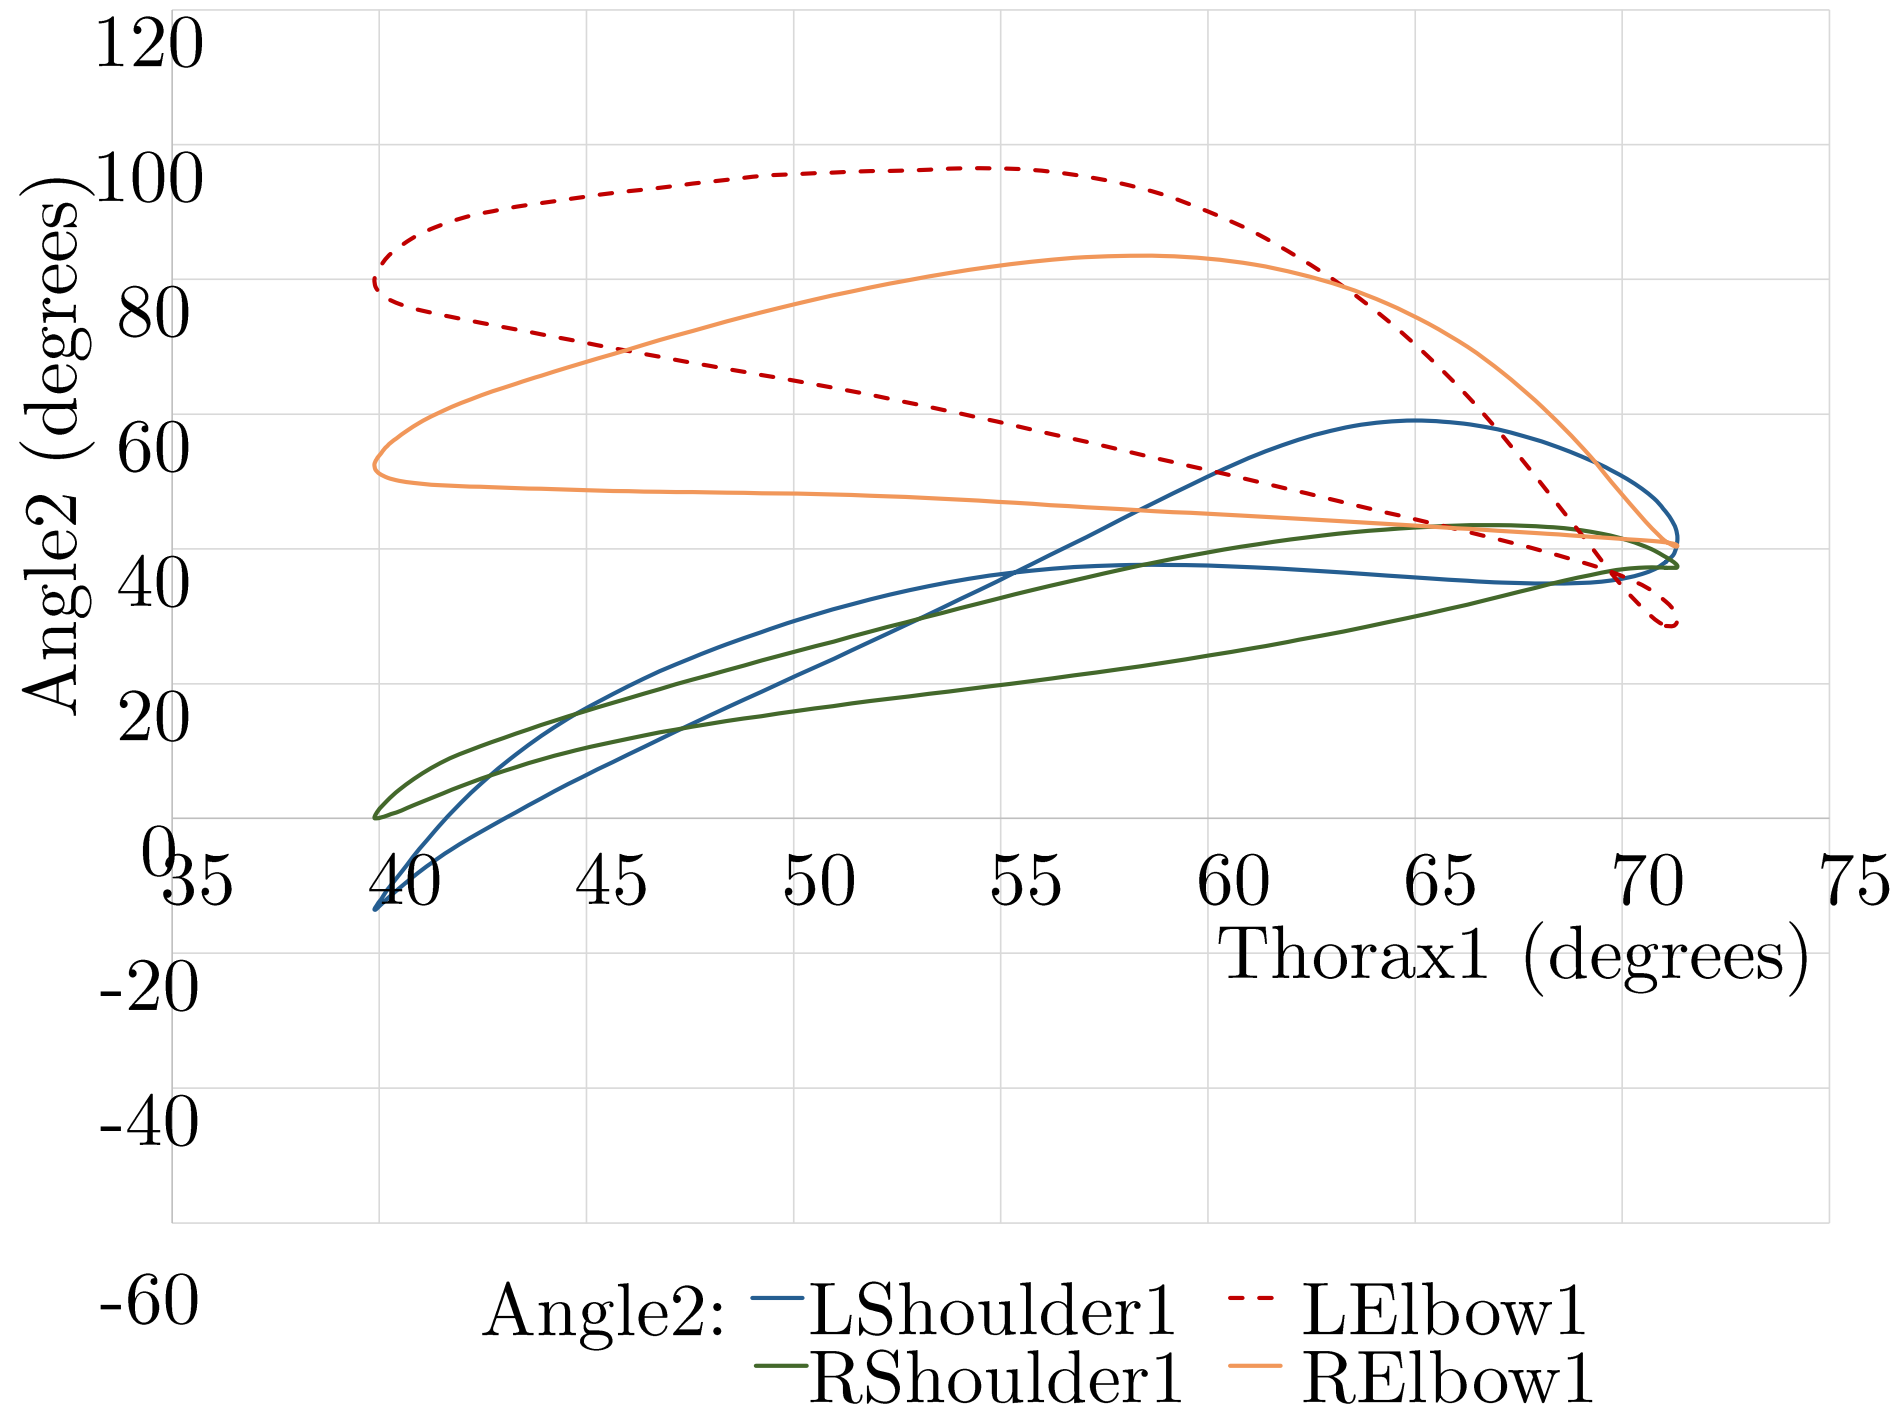

Figure S2(a)

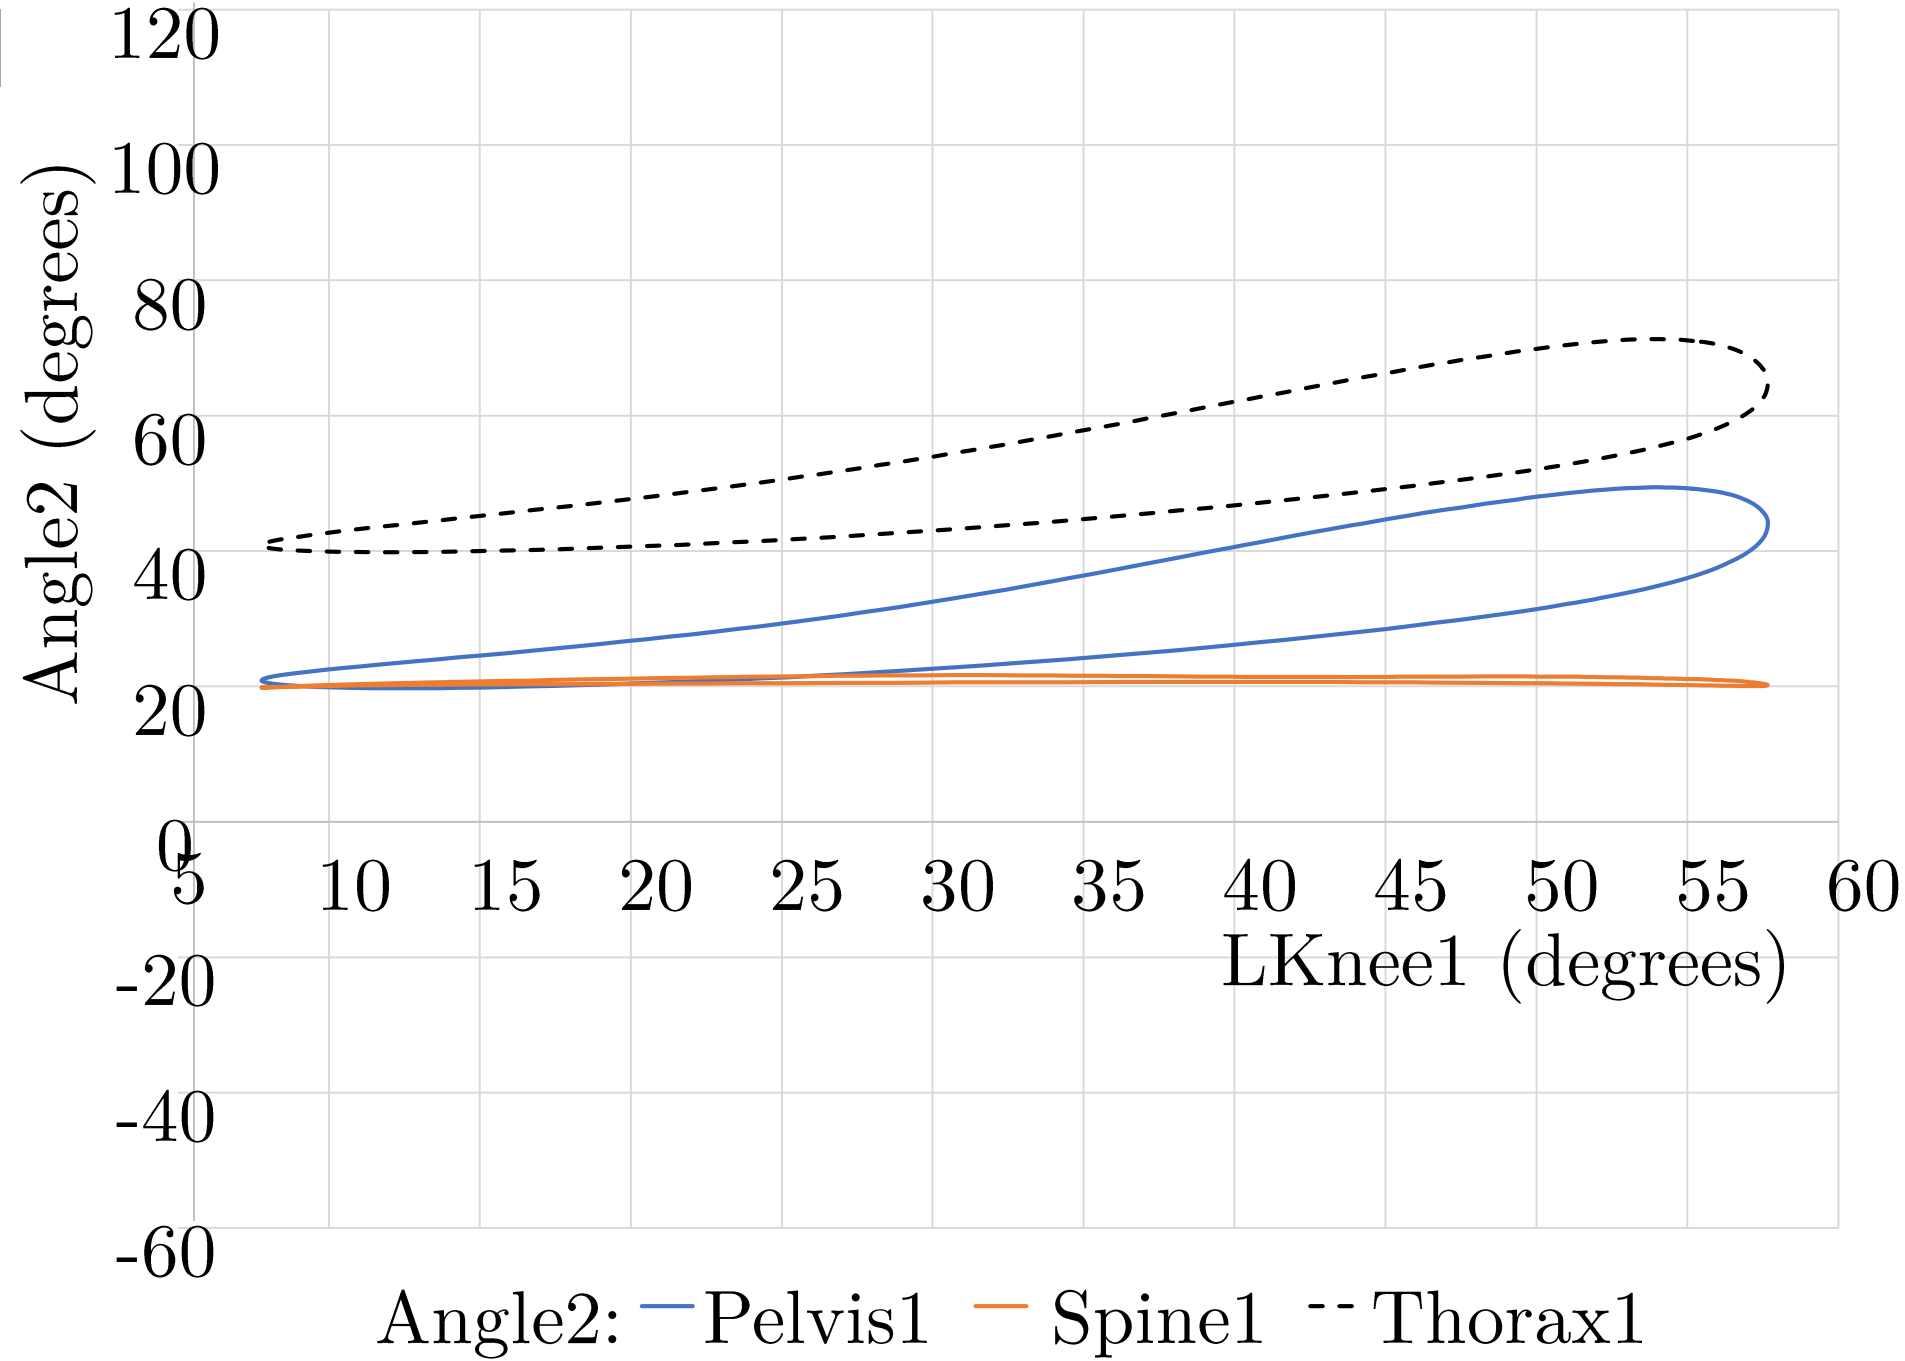



Figure S2(b)

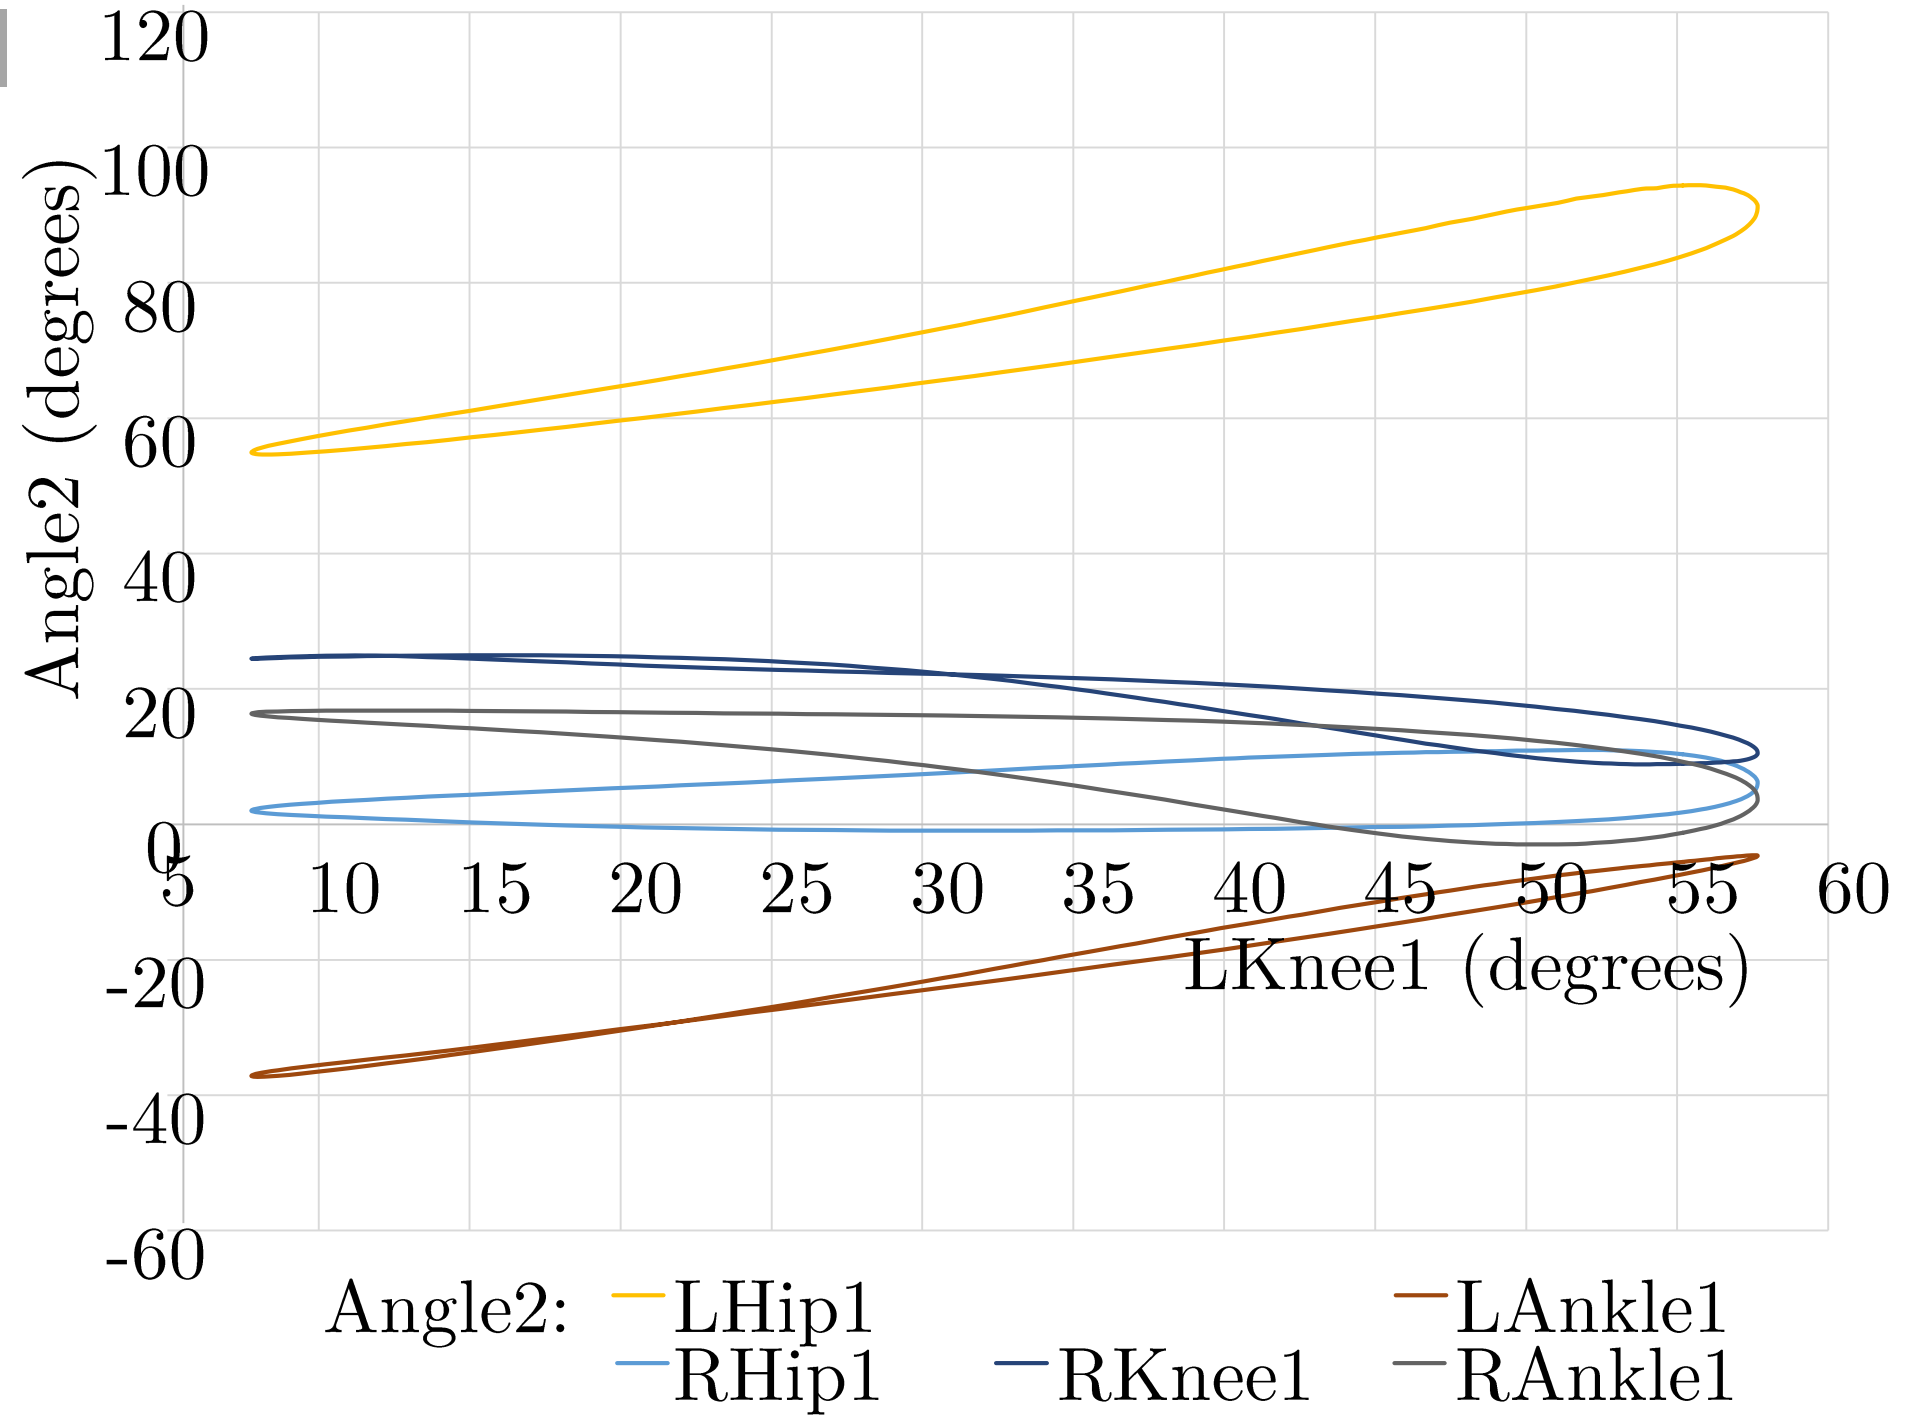

Figure S2(c)

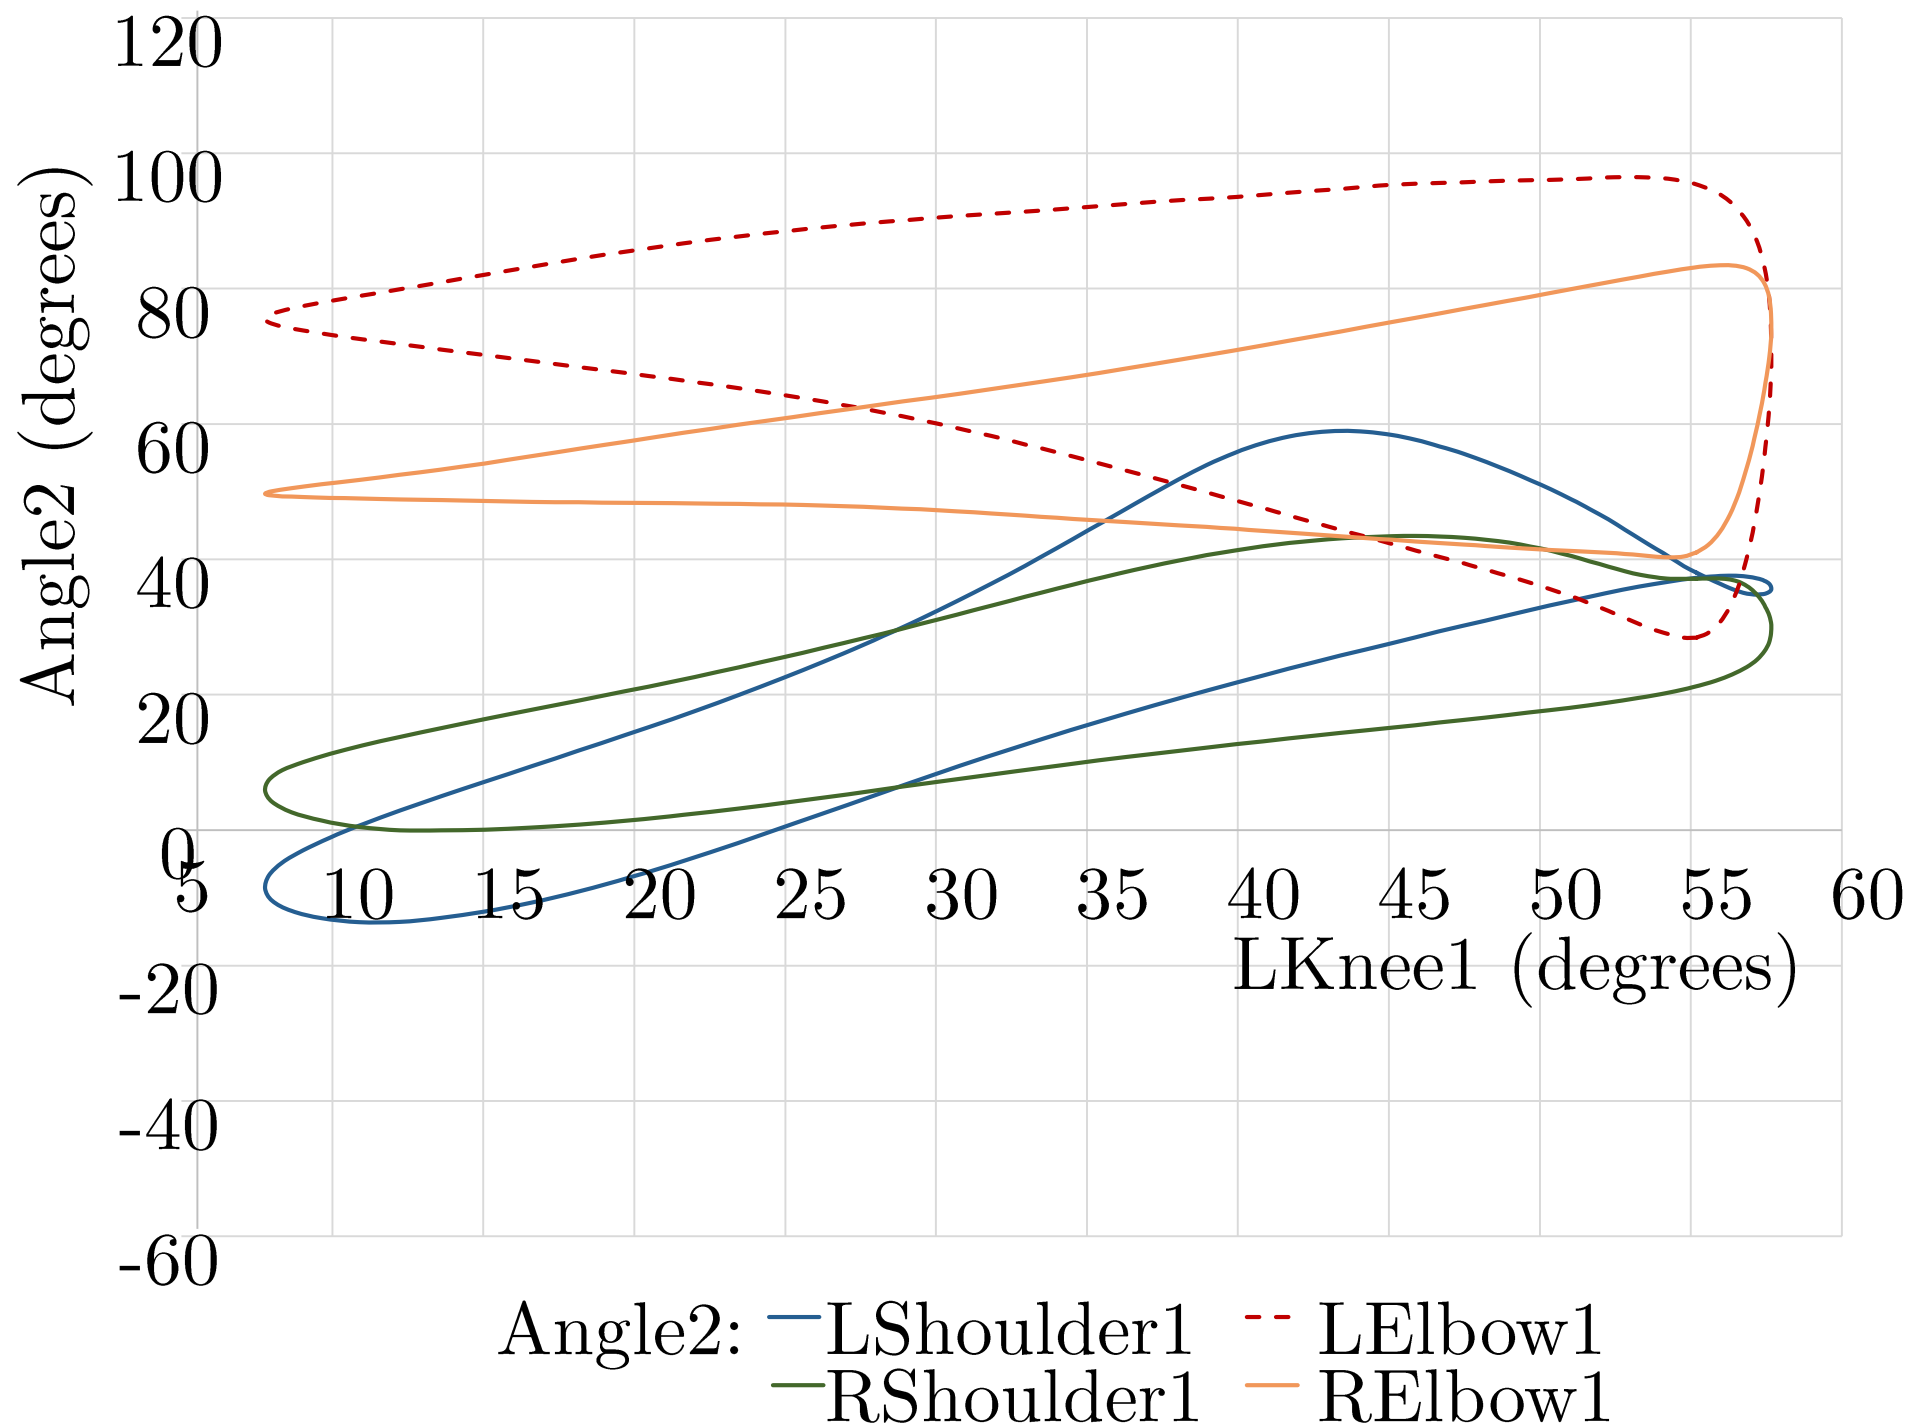

Figure S3(a)

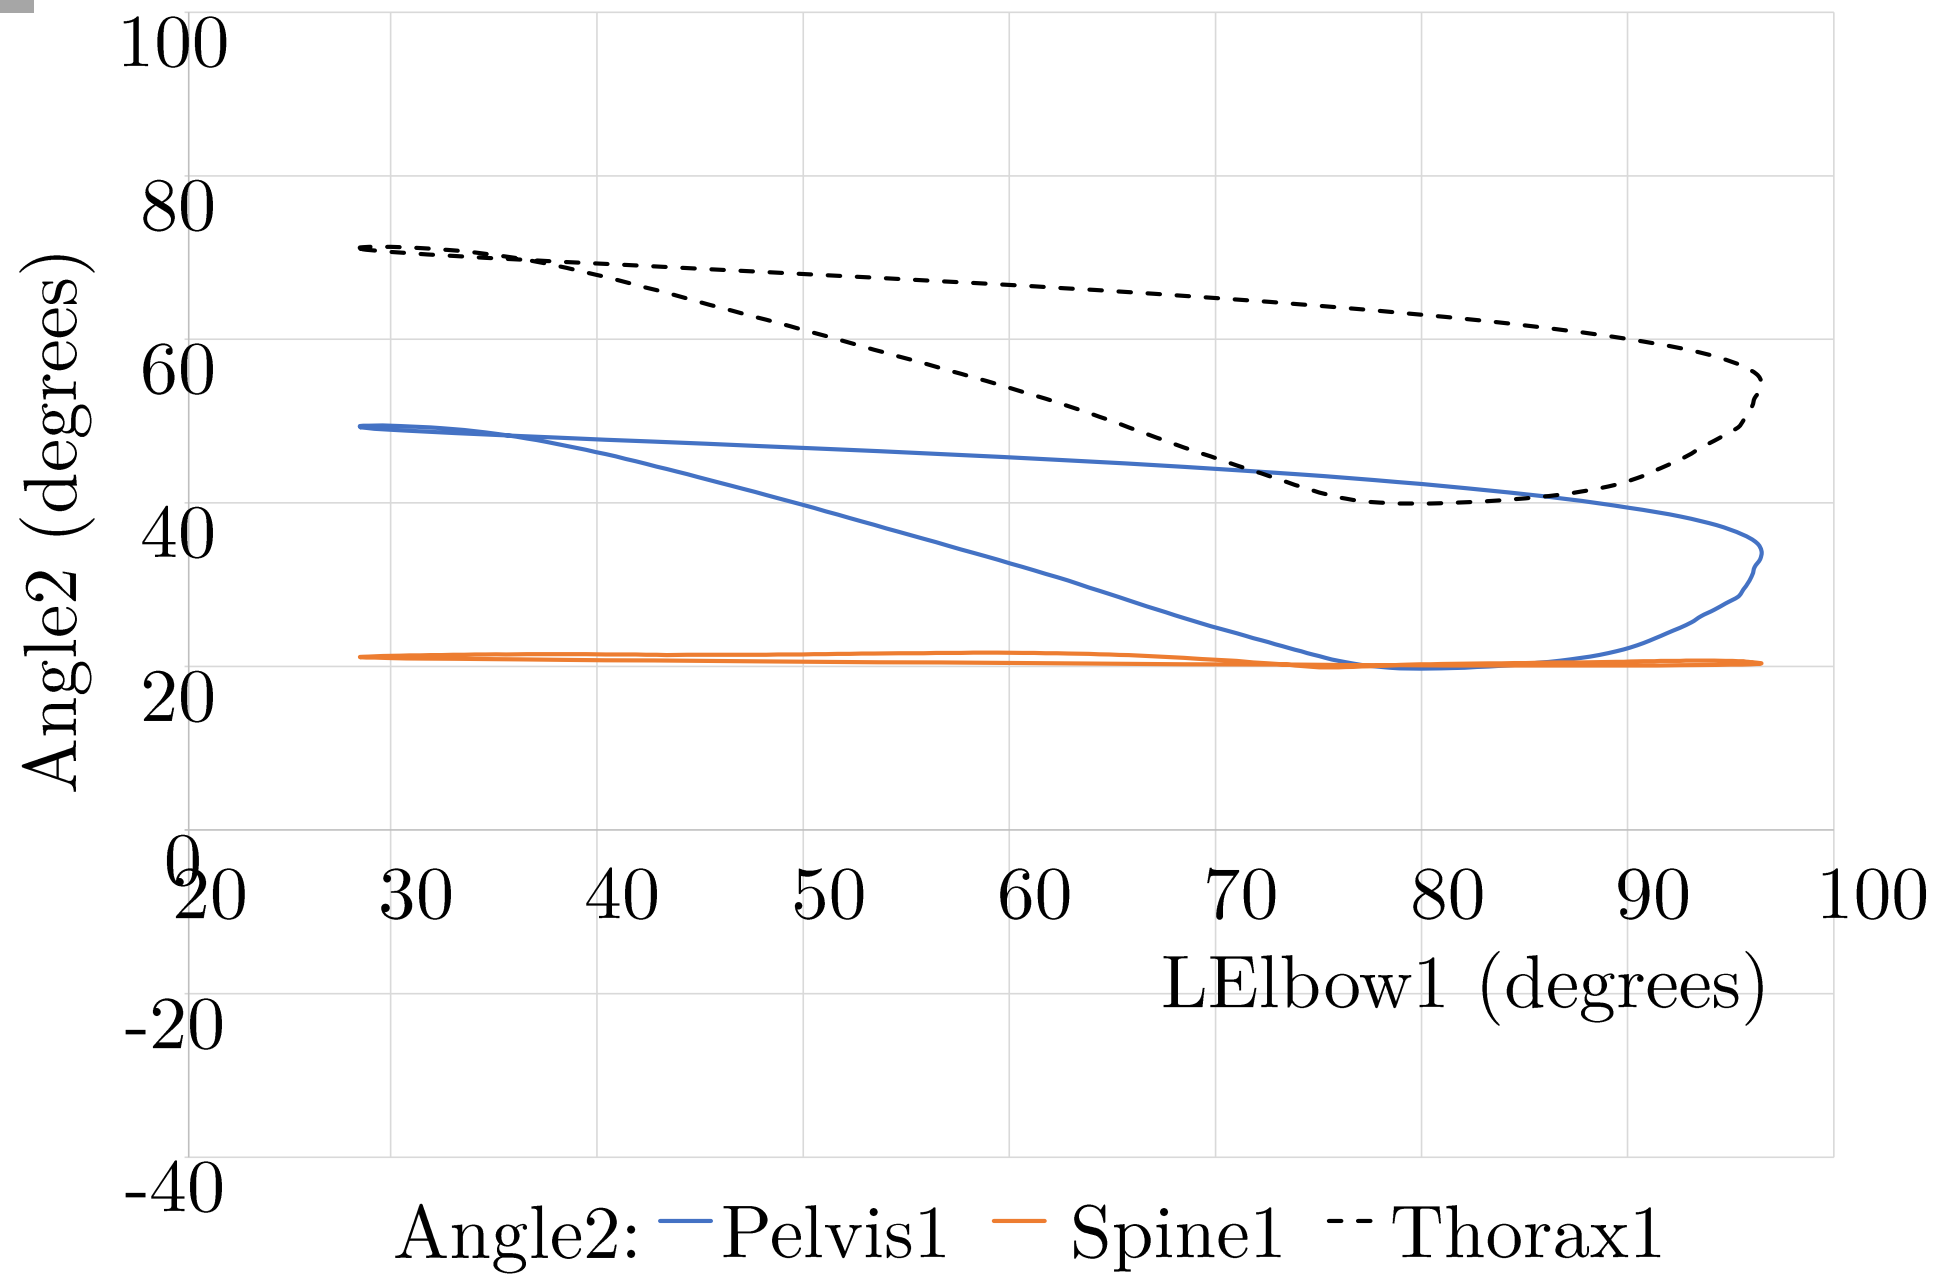

Figure S3(b)

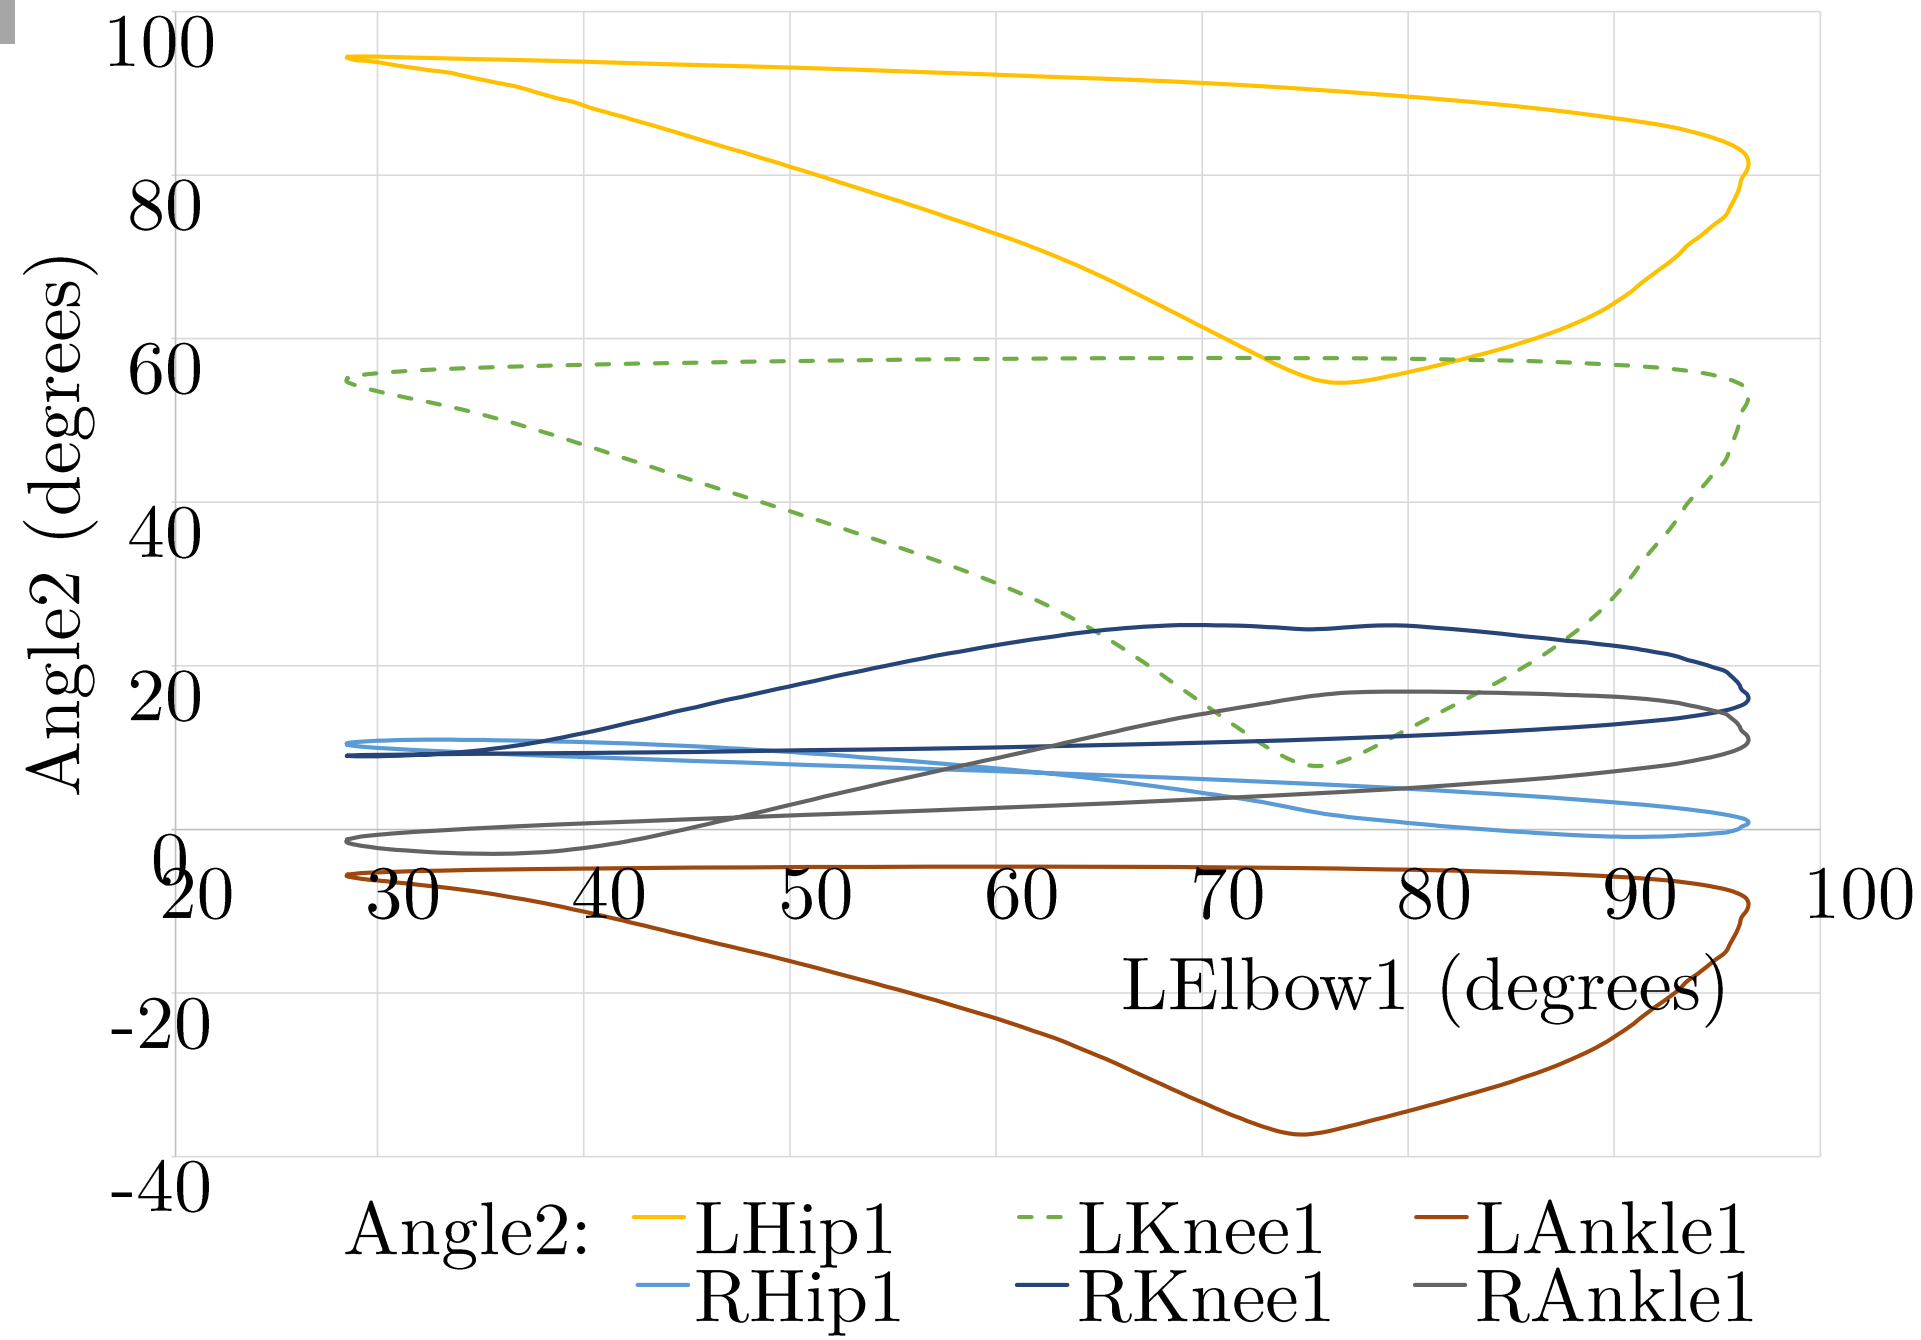

Figure S3(c)

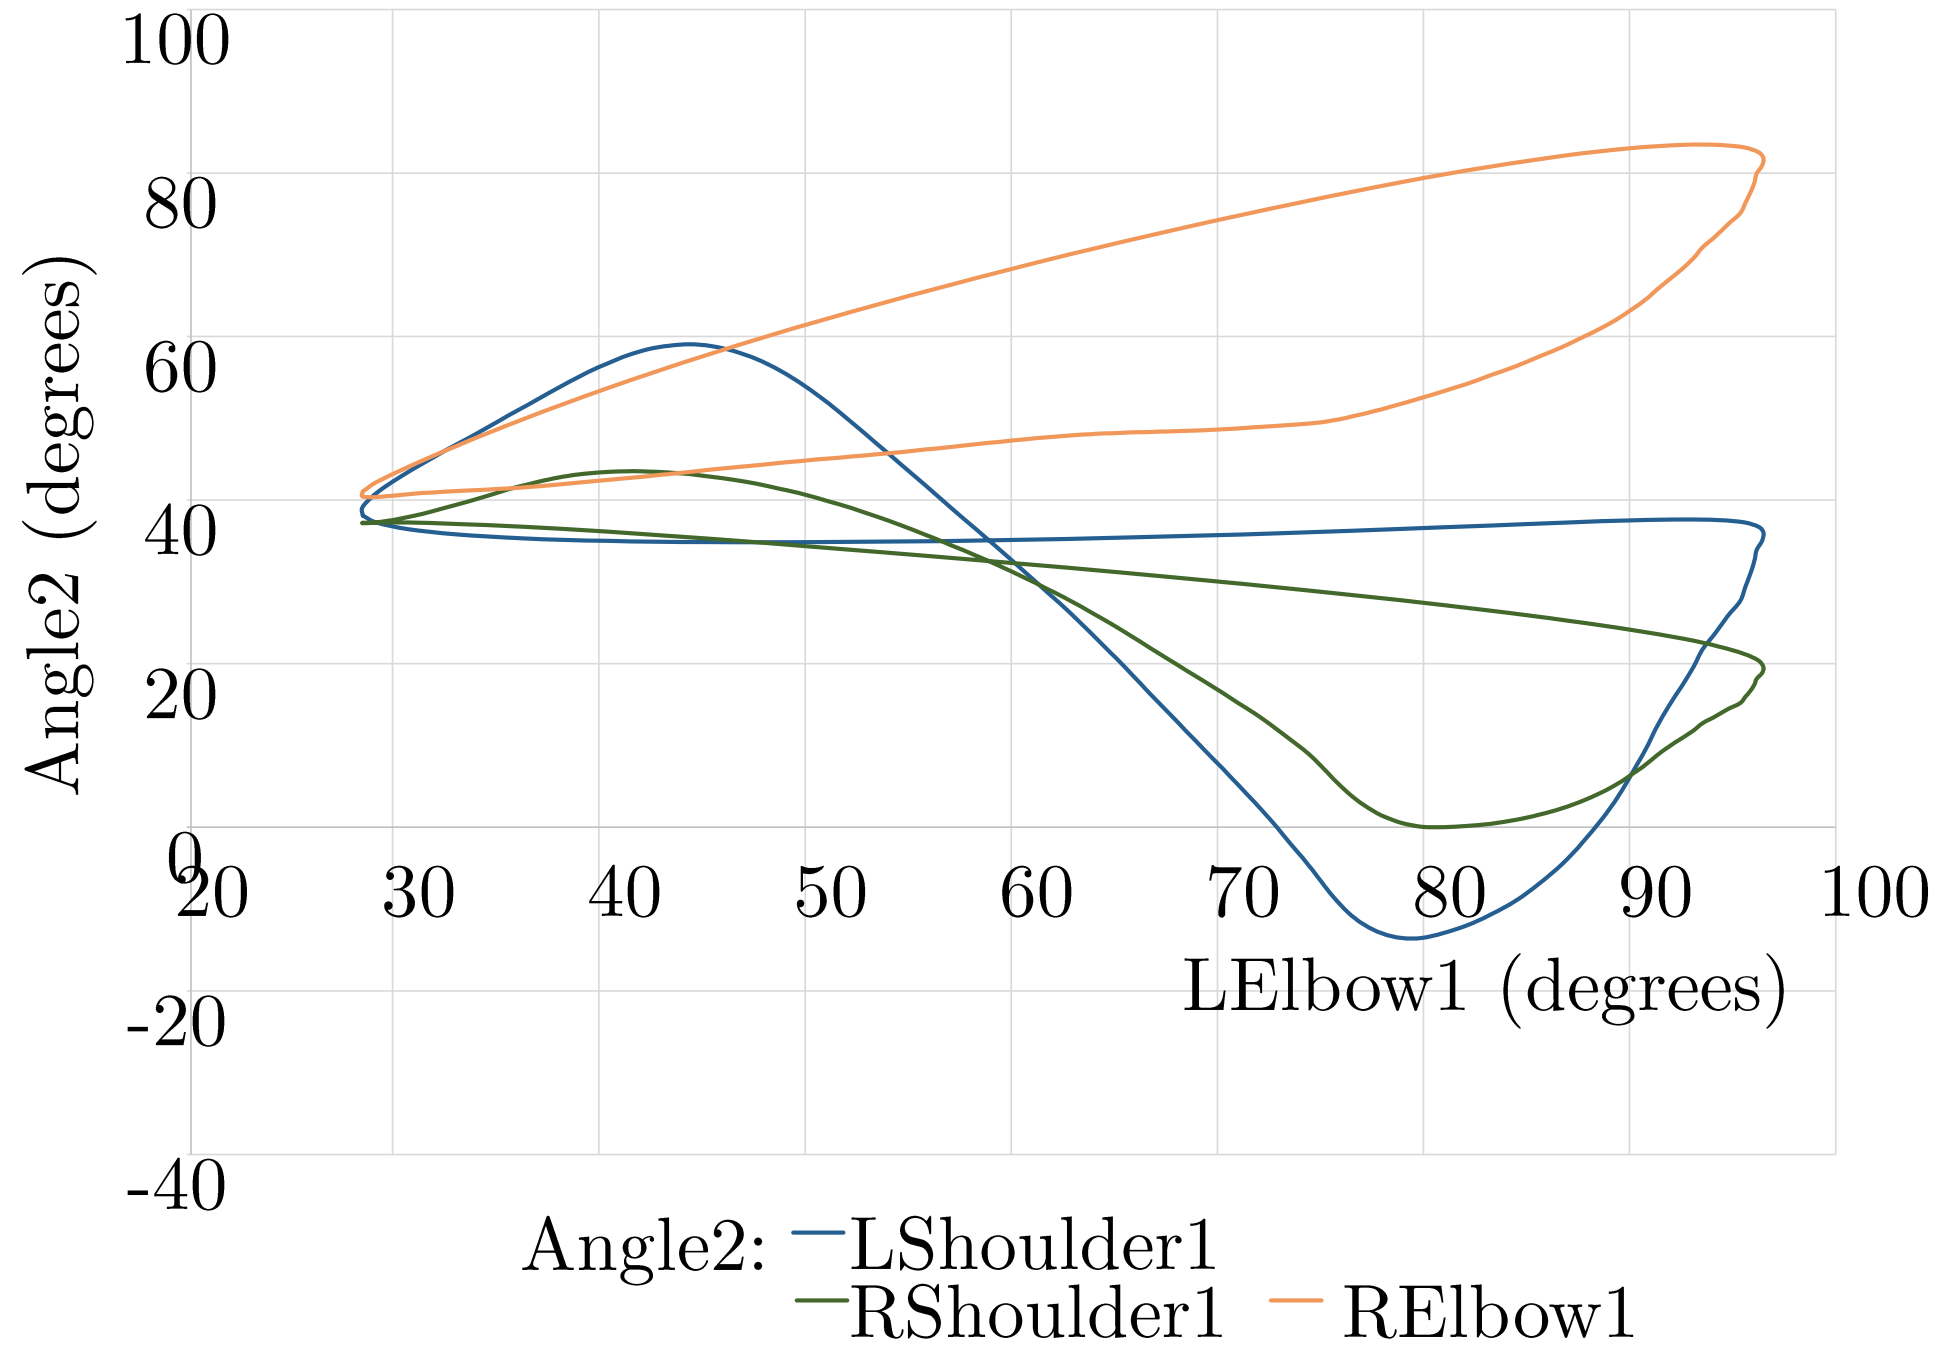

Supplement: s1 [file s1]
